# Supplementary material
Source: publisher figshare collection journal article supplement (https://karger.figshare.com/ndownloader/files/8260688)
Supplement: Supplementary file 1 [file 8260688]

**Legend to figures**

Supplementary figure 1. Ramified (a) and activated (b) microglia cells, as seen in CD68 (a and b) and Iba1 (c and d) immunostaining. Scale bars: 50 µm (a, c), 100 µm (b, d). CD68 (PGM1 clone, Dako) and Iba1 immunohistochemistry (Wako Cat. #019‐19741).

Supplementary figure 2.

Correlation of microglia scores between CD68 and Iba1 in frontal cortex and frontal white matter.
